# Supplementary material for: Millennial-scale denudation rates in the Himalaya of Far Western Nepal
Source: Copernicus journal article supplement (doi:10.5194/esurf-2019-7), 2019-02-26
Supplement: Supplementary file 1 [file esurf-2019-7-supplement.pdf]

## Contents of this file

Figures S1 to S7

Table S1

## Introduction

In the main text, Figures 2 and 4 show maps of bedrock lithology, normalized channel steepness, mean annual precipitation, specific stream power, microseismicity, and landslide scars across the entire study region in Far Western Nepal. Here, Figures S1-S6 show maps of these characteristics for the individual study basins, which form the basis for the basin-averaged values in Table 1. Figure S7 shows the extent of modern glaciers, which was used to compute the fractional areal coverage of ice in each basin,  $f_{ice}$  (Section 3.2.1). Table S1 reports grain size data for the sediment samples collected for cosmogenic nuclide analysis.

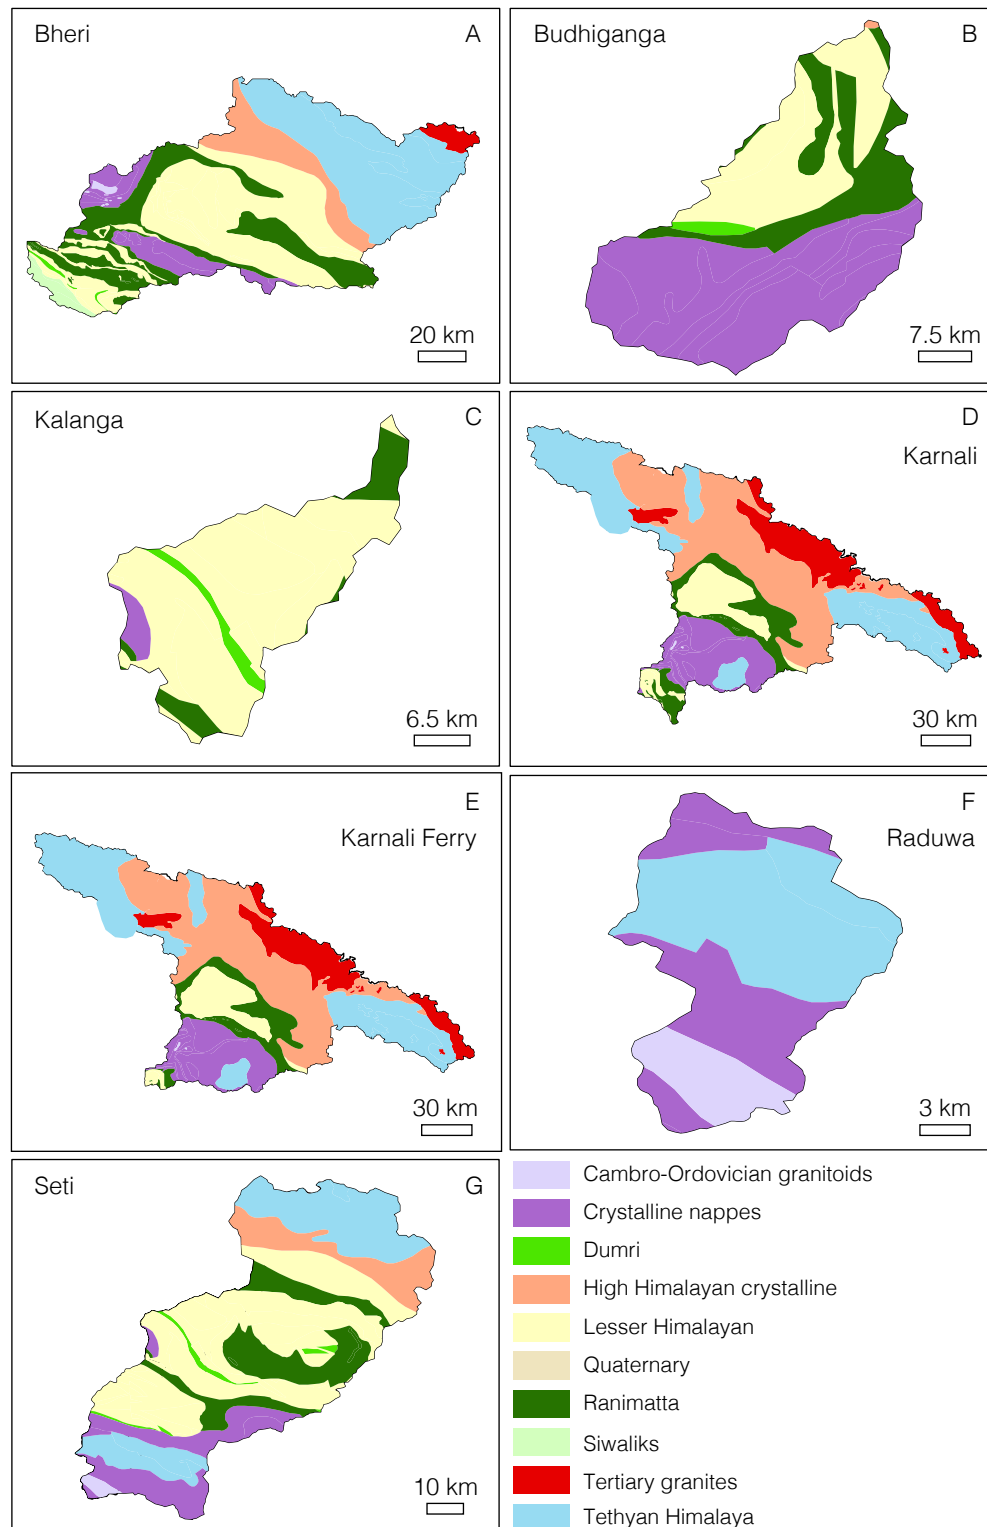

**Figure S1.** Lithologic maps showing the distribution of tectonostratigraphic units in the study basins (DeCelles et al., 2001; Robinson et al., 2006; Yin, 2006; Ojha et al., 2009).

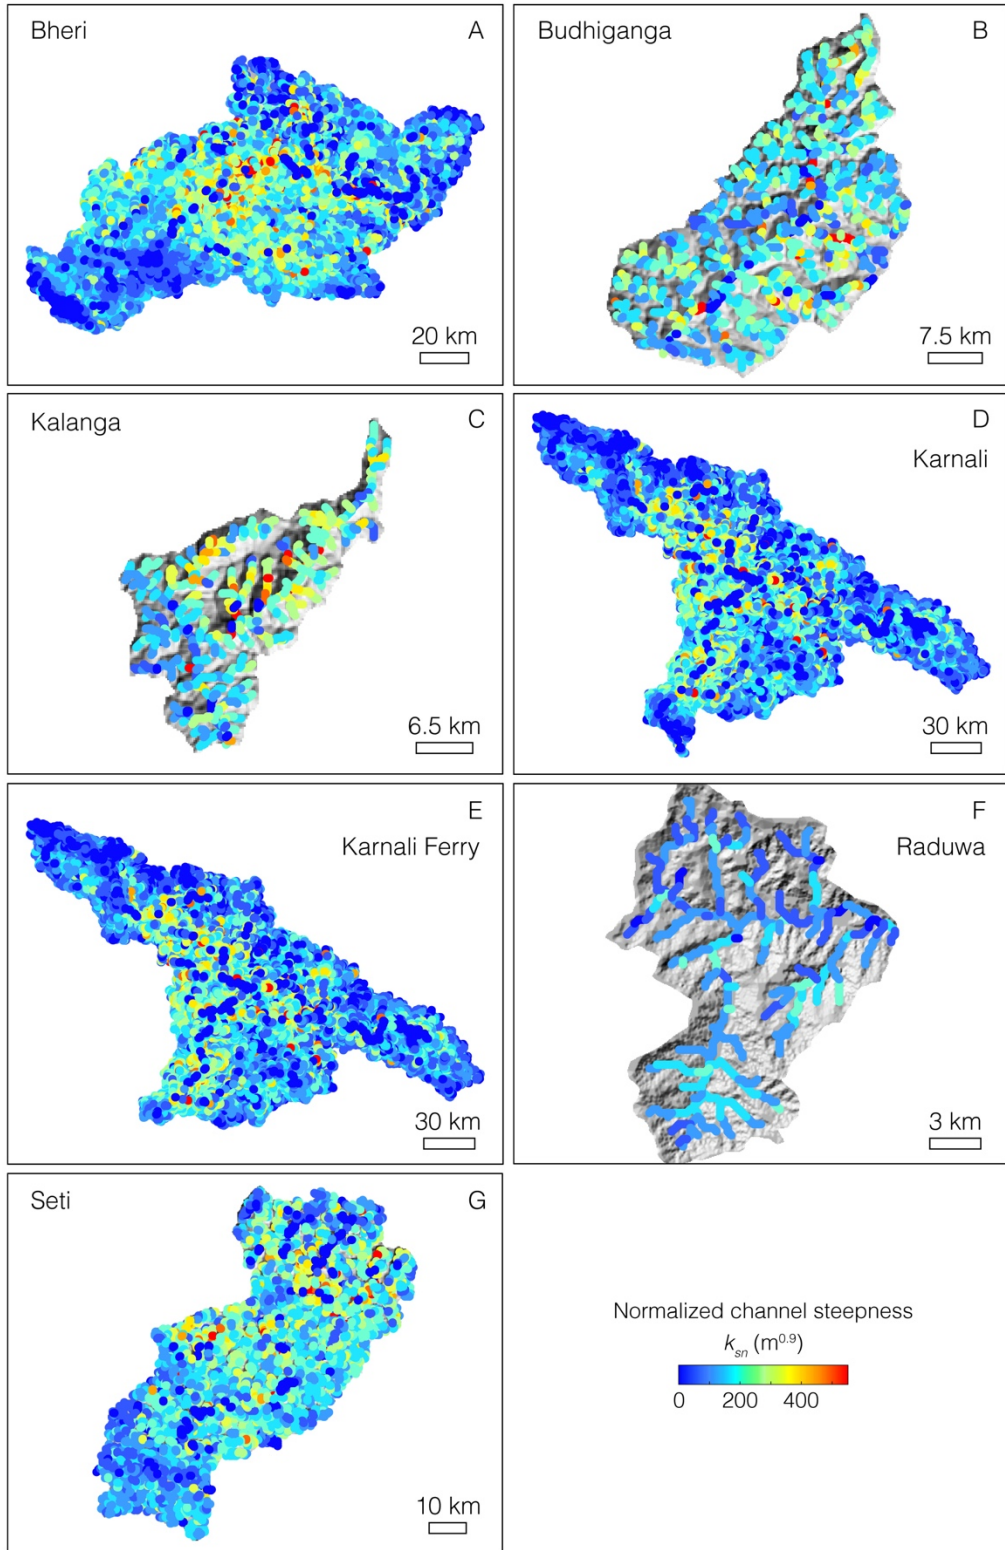

**Figure S2.** Normalized channel steepness (Equation 1) in the study basins atop grayscale shaded relief.

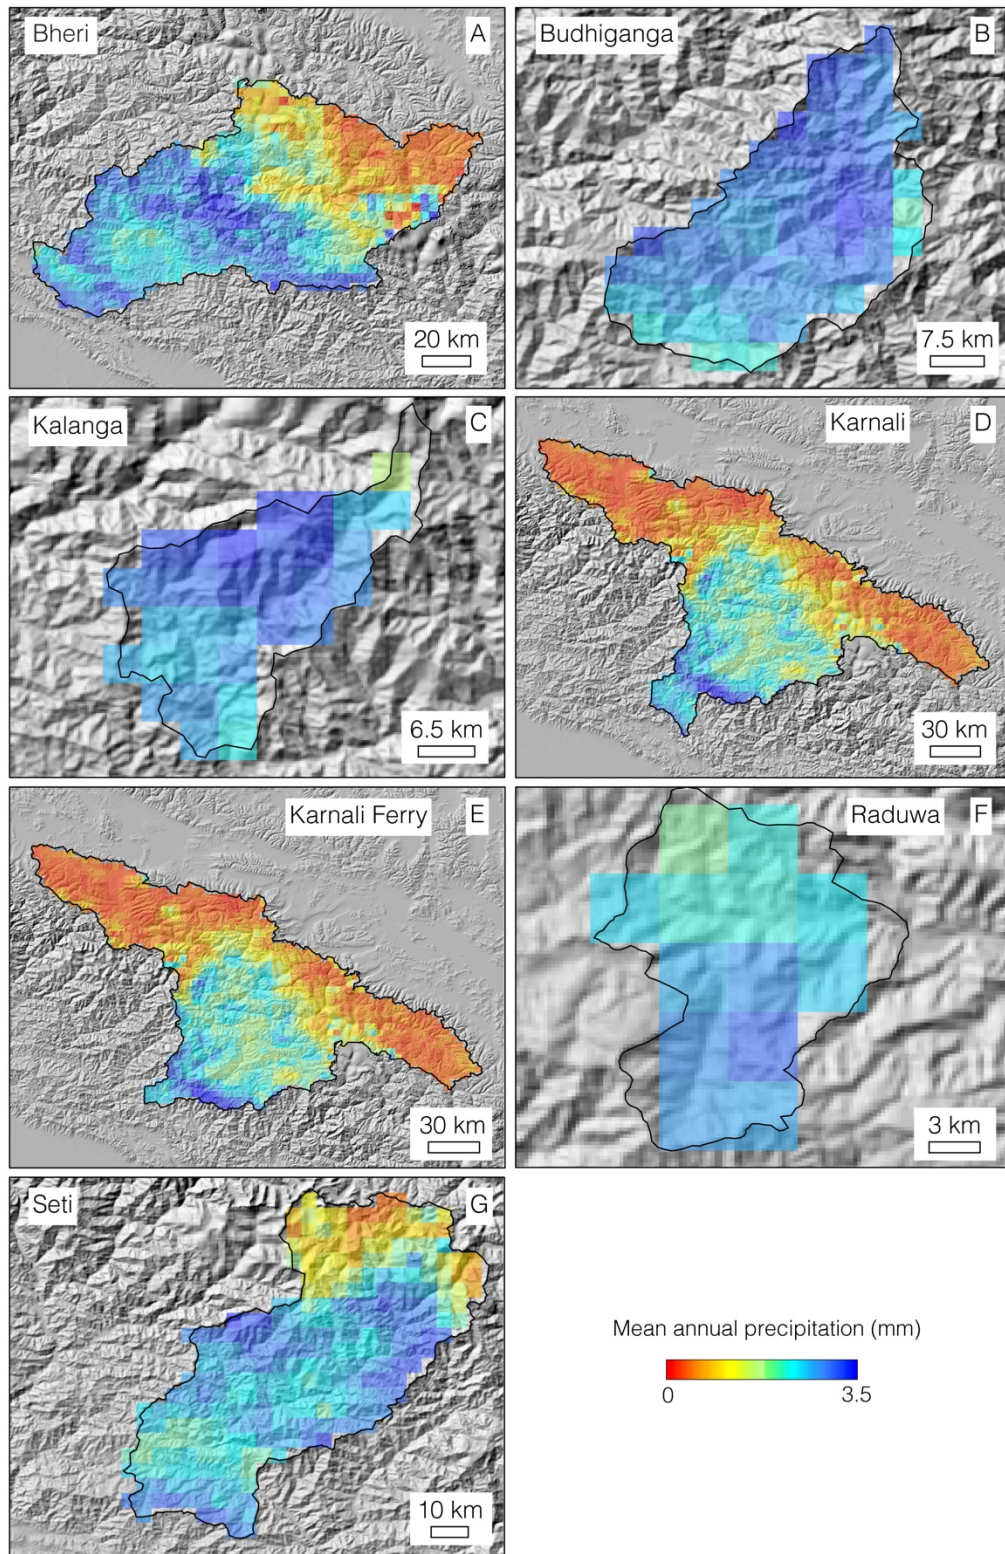

**Figure S3.** Mean annual precipitation (Bookhagen and Burbank, 2010) atop grayscale shaded relief in the study basins.



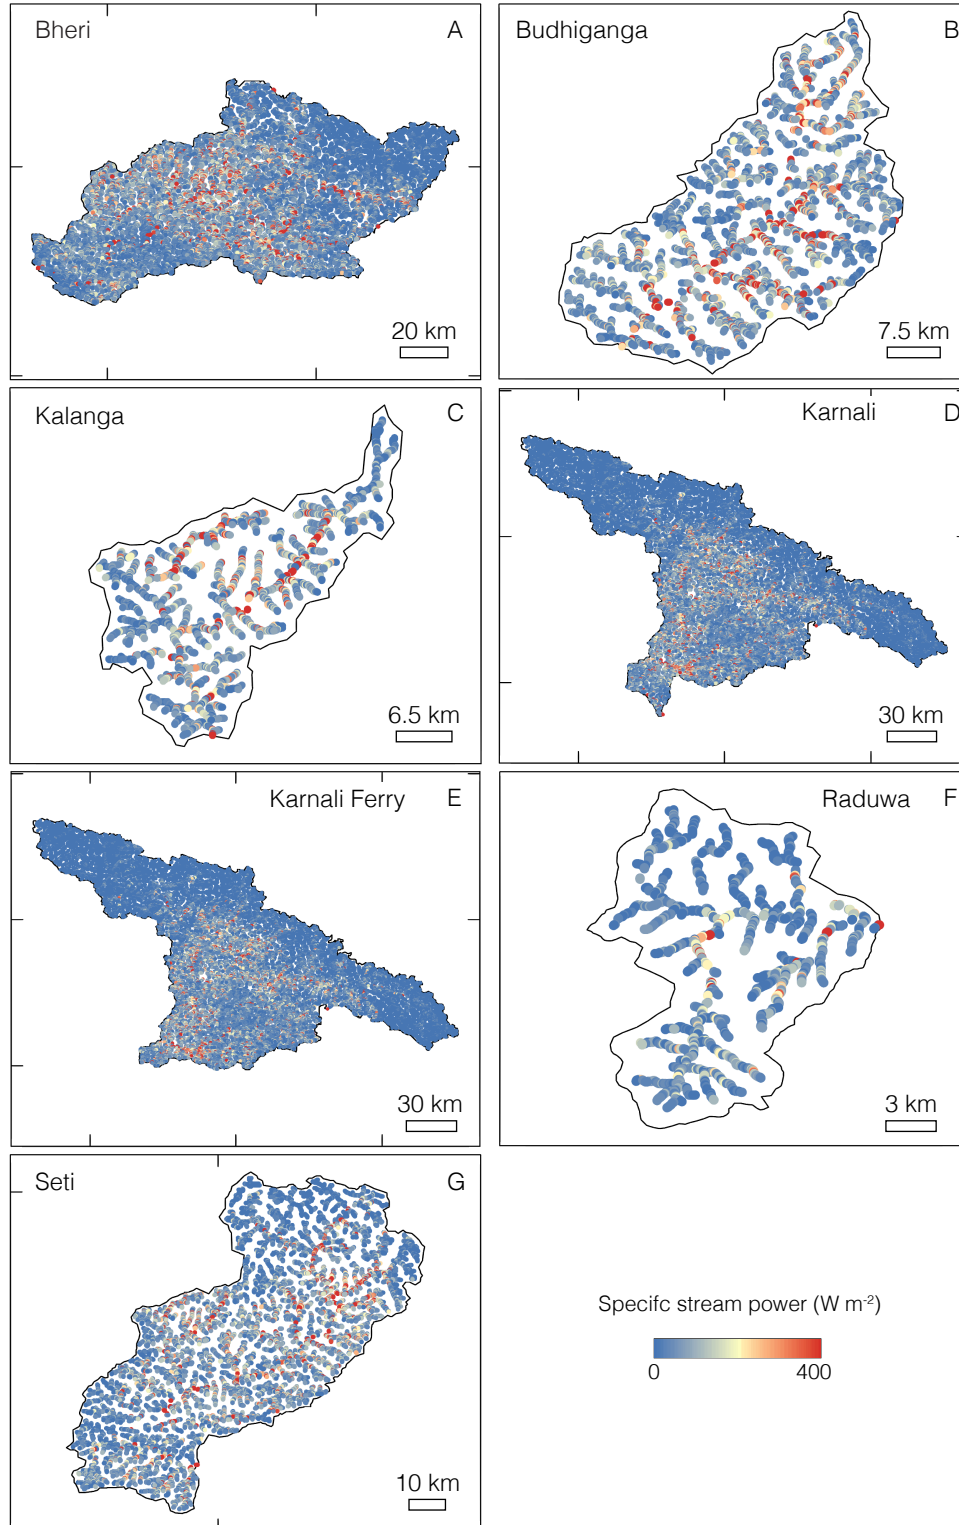

**Figure S4.** Specific stream power in the study basins above a drainage area threshold of 1 km<sup>2</sup> (Section 3.4).

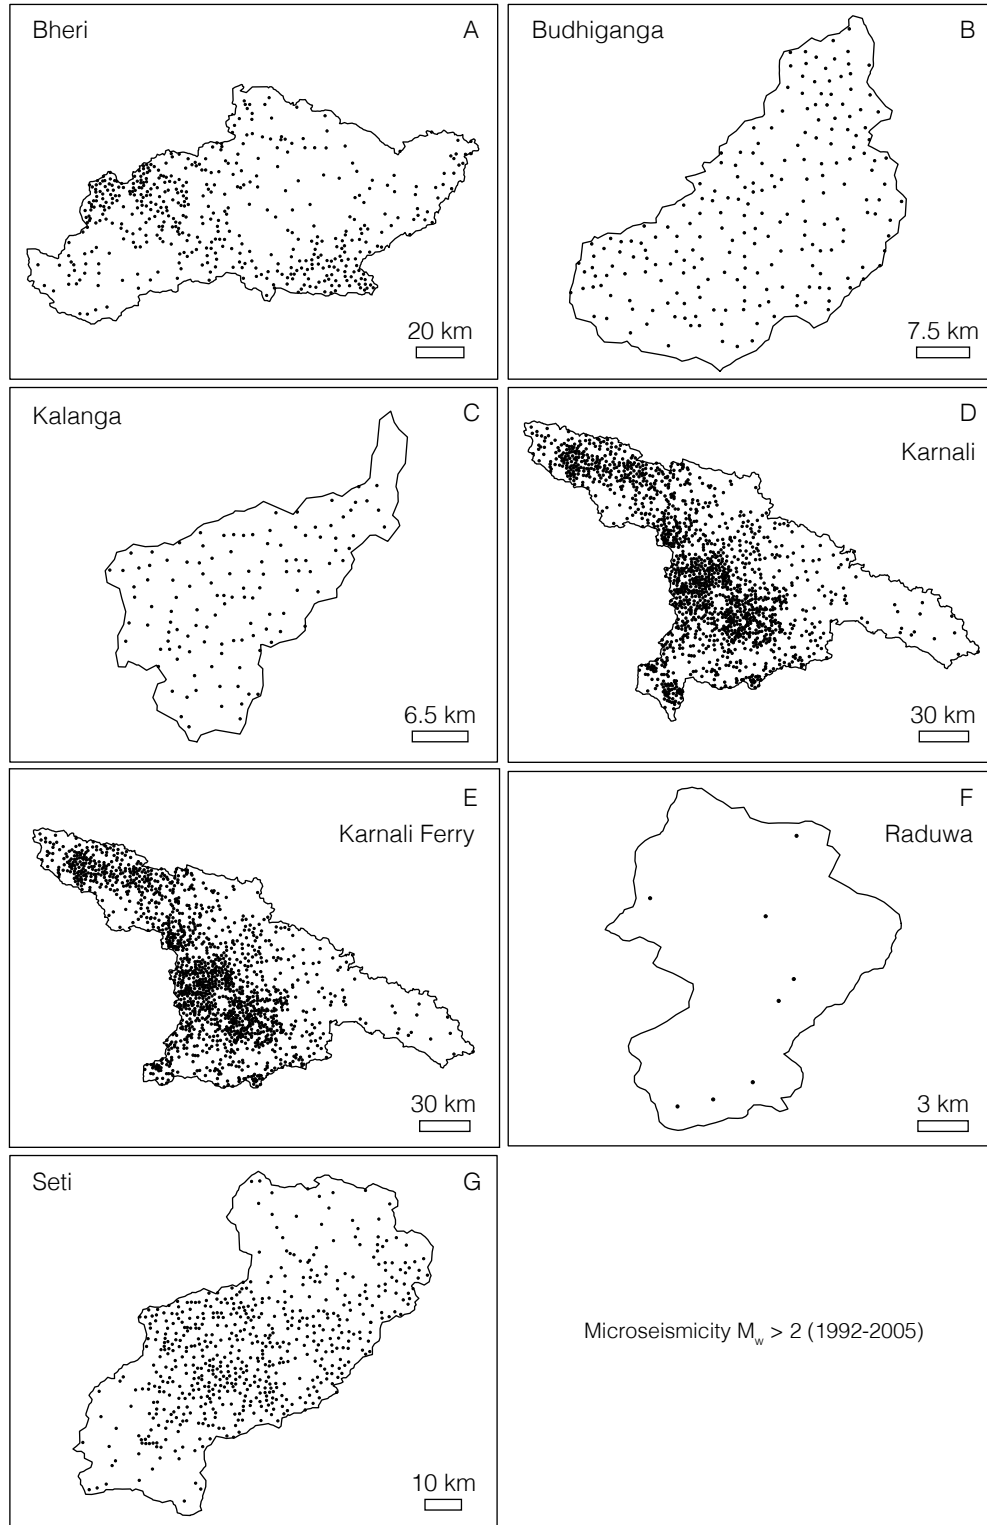

**Figure S5.** Locations of microseismic events ( $M_w > 2$ ) over 1992-2005 in the study basins compiled from the epicenter map published by the Department of Mines and Geology of Nepal, 1992-2005.

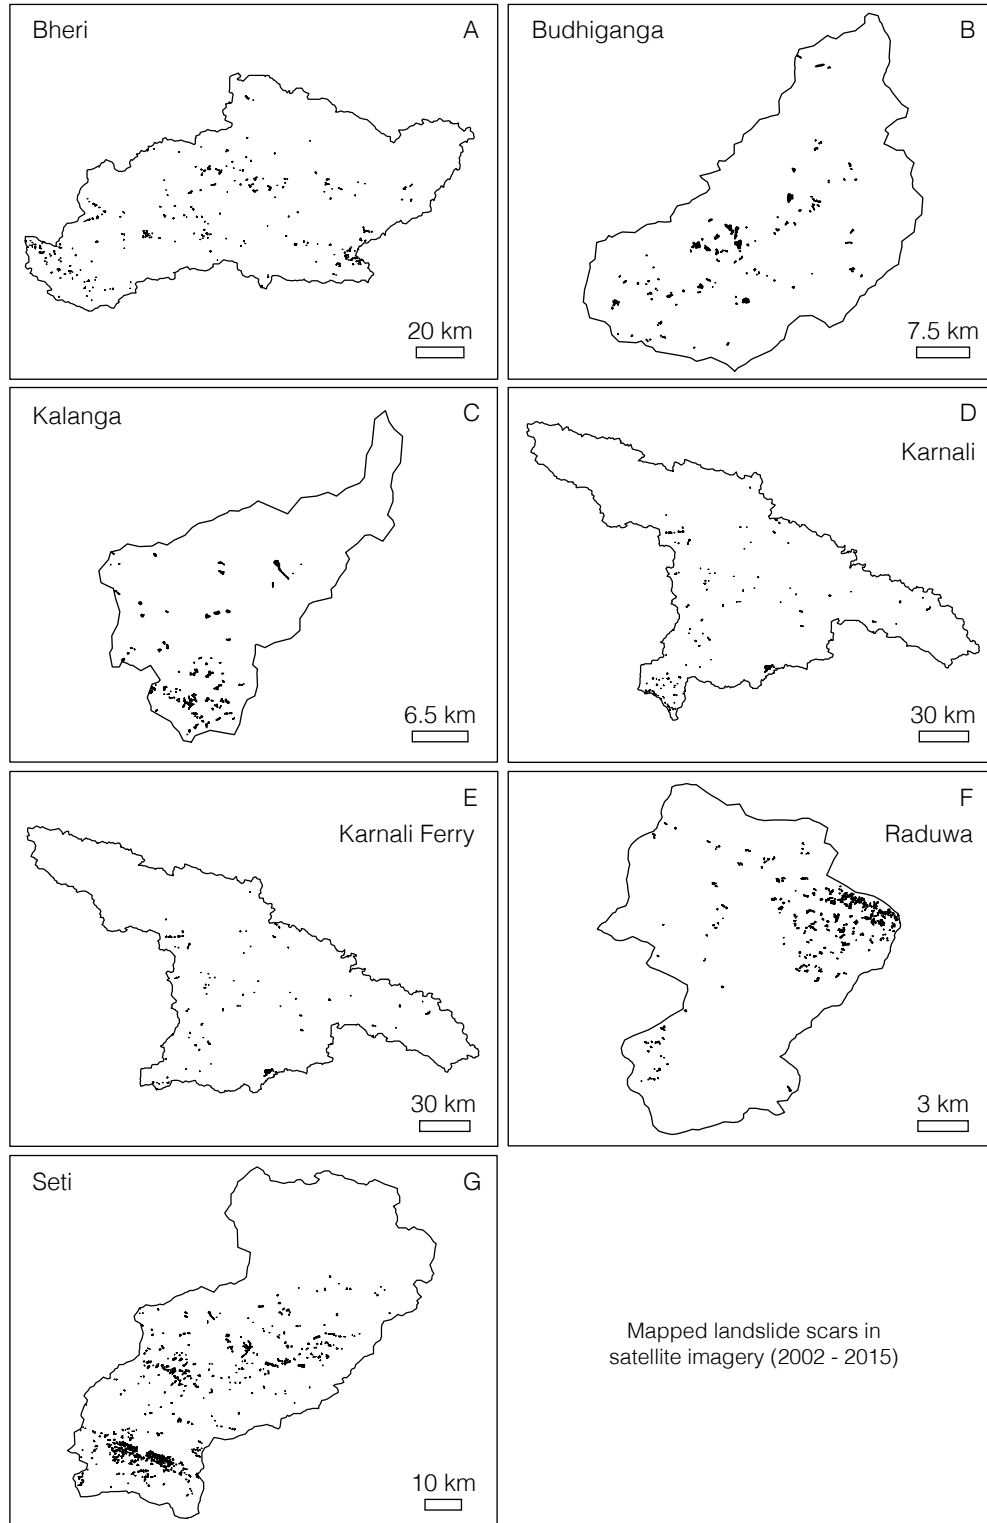

**Figure S6.** Landslide scars mapped in 2002-2015 satellite imagery in the study basins.

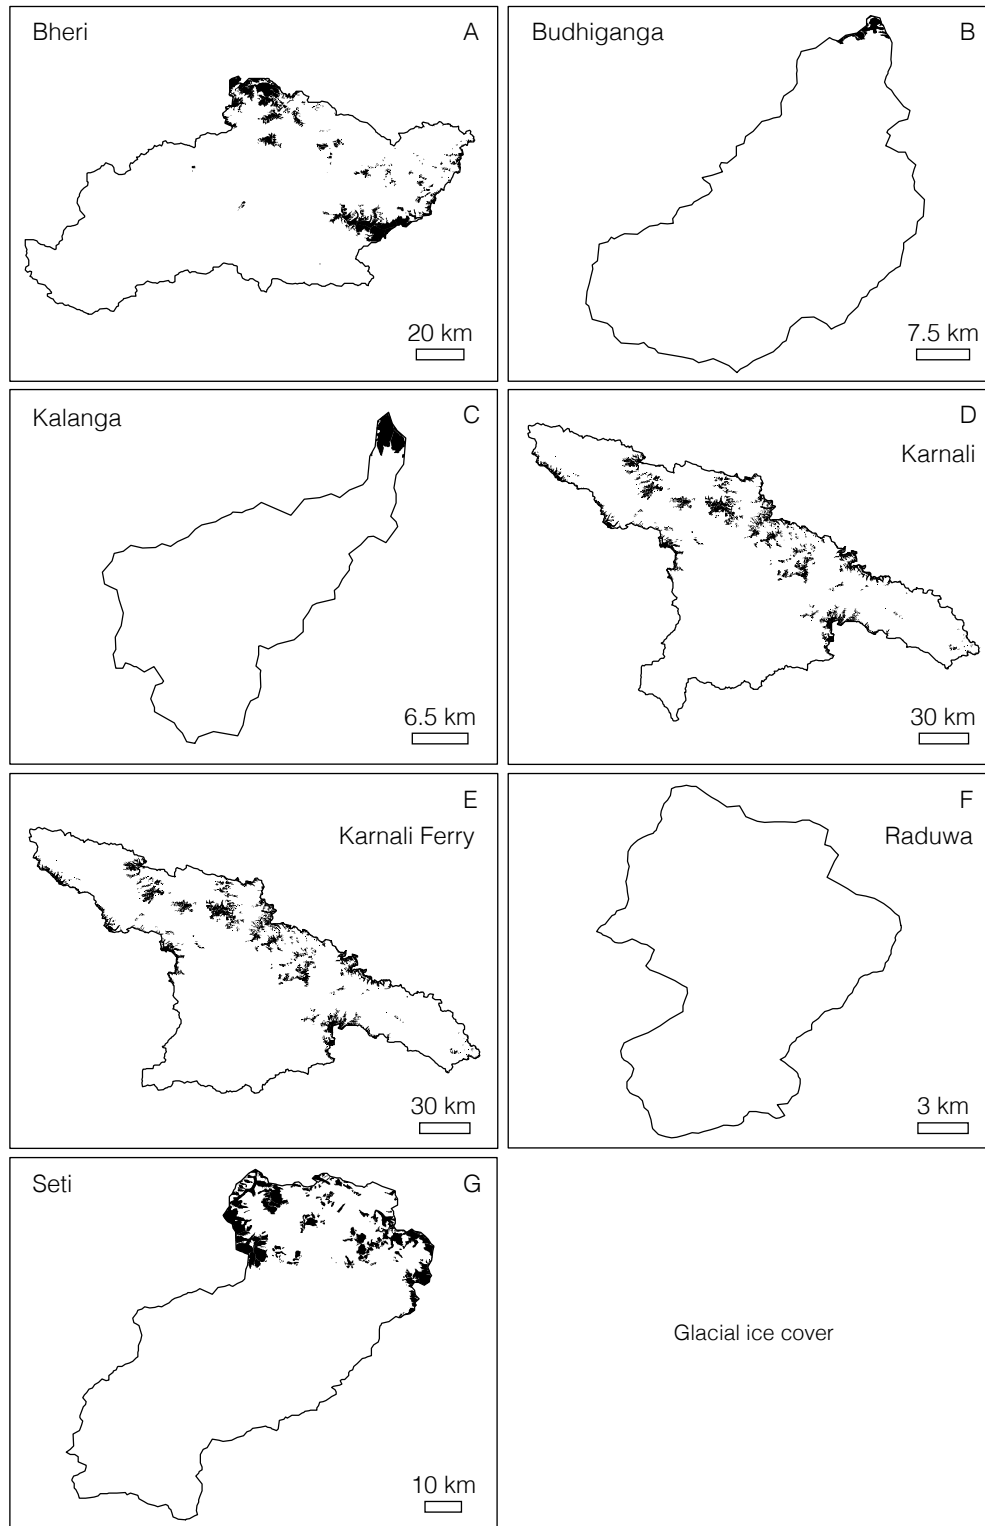

**Figure S7.** Extent of mountain glaciers (GLIMS and National Snow and Ice Data Center, 2005).



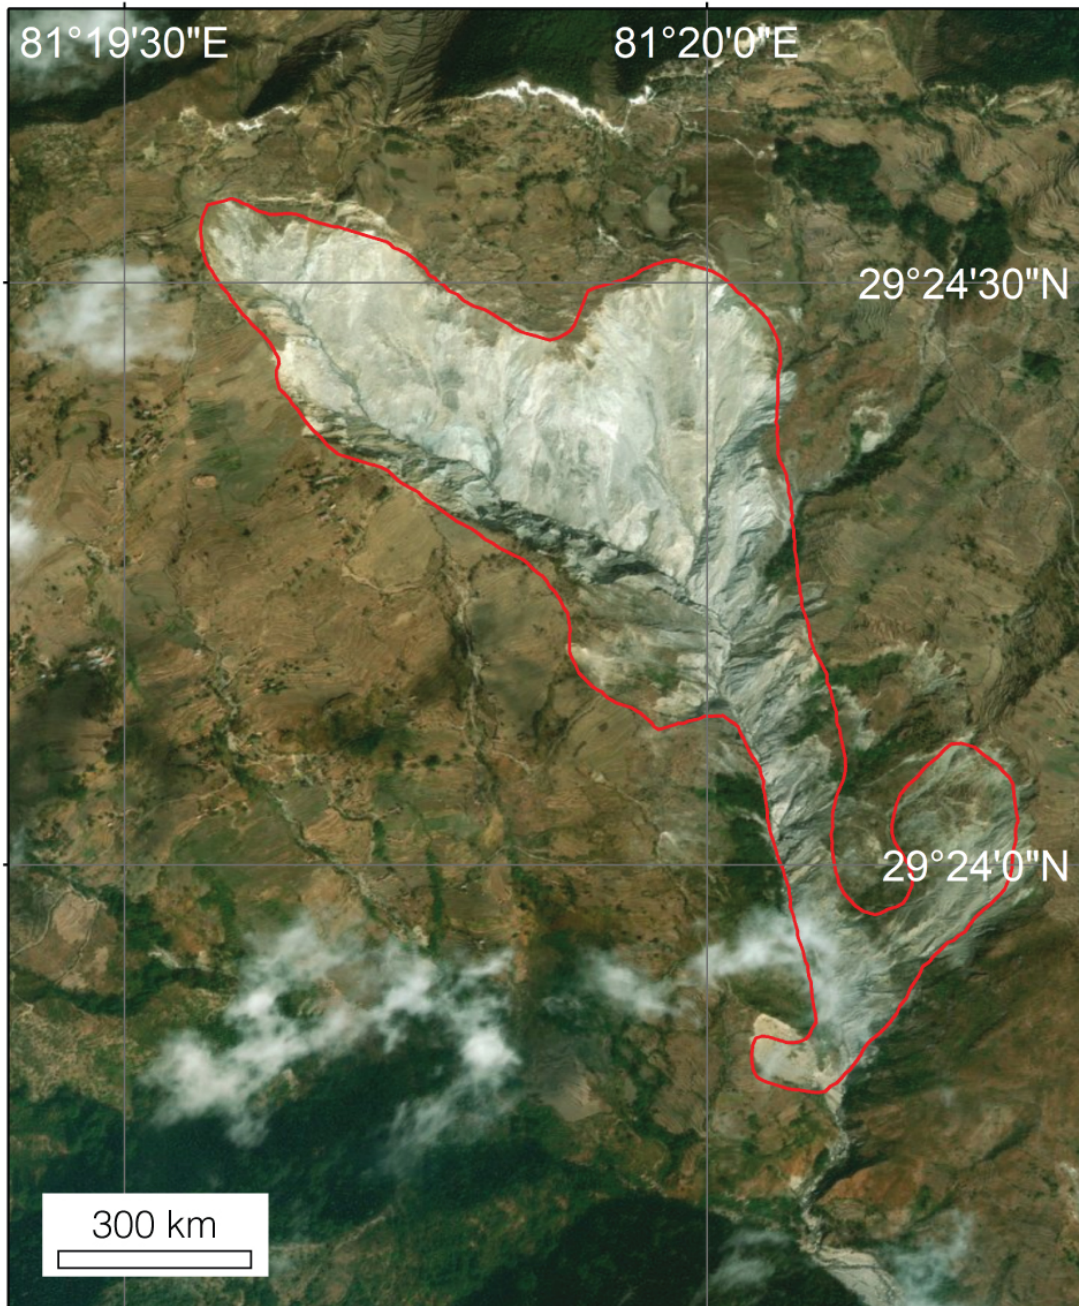

**Figure S8.** Example of landslide scar mapped from satellite imagery in Google Earth. This was the basis for the landslide scar maps in Figure S6 and the measurement of  $f_{scar}$  (Table 1).

**Table S1.** Grain size measurements in sediment samples collected for cosmogenic nuclide analysis.

| Sieve size (mm) | Fraction of total mass (%) |            |         |         |               |        |      |
|-----------------|----------------------------|------------|---------|---------|---------------|--------|------|
|                 | Bheri                      | Budhiganga | Kalanga | Karnali | Karnali Ferry | Raduwa | Seti |
| >2.0            | 0.5                        | 0.7        | 1.2     | 0.6     | 0.5           | 53.1   | 1.1  |
| 1.0 - 2.0       | 0.4                        | 1.4        | 6.4     | 1.2     | 1.0           | 32.5   | 6.9  |
| 0.5 - 1.0       | 2.8                        | 17.8       | 17.8    | 16.0    | 46.4          | 7.8    | 22.7 |
| 0.25 - 0.5      | 44.8                       | 57.2       | 28.4    | 30.7    | 44.3          | 1.1    | 35.6 |
| <0.25           | 51.5                       | 23.0       | 46.2    | 51.5    | 7.8           | 5.6    | 33.8 |
